# Supplementary material for: Anticipated Transport Choices in a World Featuring Autonomous Transport Options
Source: MDPI journal article supplement (doi:10.3390/su151411245), 2023-07-19

## Supplementary material

### **Survey items**

#### **What is your age in years?**

Please type your age in the box below.

#### **How do you describe your gender?**

- Man/male
- Woman/female
- Non-binary
- I use a different term
- Prefer not to answer

#### **What is your residential postcode?**

Please enter in the box below

#### **What is the highest qualification that you have obtained?**

- Less than year 10 or equivalent
- Year 10 or equivalent
- Year 11 or equivalent
- Year 12 or equivalent
- Certificate I or Certificate II
- Certificate III or Certificate IV
- Associate Diploma
- Undergraduate Diploma
- Bachelor's degree
- Master's Degree, Postgraduate Degree, or Postgraduate Diploma
- Doctorate

#### **In a typical week, which of the following modes of transport do you use to get around?**

Select all that apply

- Personal vehicle (e.g. car, truck, motorcycle, etc)
- Ride-hailing services (e.g. Uber, Ola, Didi, Taxi)
- Public transport (bus, train, light rail, ferry)
- Personal micromobility (e.g. E-bike, e-scooter)
- Micromobility sharing (e.g. Neuron, Beam, Lime)
- Car-sharing (e.g. GoGet, Car Next Door)
- Bicycle/skateboard/scooter
- Walking
- None of these

**Please rate how important these factors are when you are choosing which mode of transport to use:**

|                                                        | Very unimportant | Somewhat unimportant | Neutral | Somewhat important | Very Important |
|--------------------------------------------------------|------------------|----------------------|---------|--------------------|----------------|
| Cost                                                   |                  |                      |         |                    |                |
| Convenience                                            |                  |                      |         |                    |                |
| Comfort (e.g. personal space, protection from weather) |                  |                      |         |                    |                |
| Inclusion of physical activity                         |                  |                      |         |                    |                |
| Safety                                                 |                  |                      |         |                    |                |
| Environmental impact                                   |                  |                      |         |                    |                |

**How do you feel about fully autonomous vehicles being widely used in the future?**

- Very Negative
- Negative
- Neutral
- Positive
- Very Positive

**If you lived in this world, in a typical week which of the following modes of transport would you use to get around?**

Select all that apply

Conventional personal vehicle (e.g. car, truck, motorcycle, etc)

- Autonomous personal vehicle
- Conventional ride-hailing services (e.g. Uber, Ola, Didi, Taxi)
- Autonomous ride-hailing services
- Flying Autonomous vehicle
- Autonomous public transport (bus, train, light rail, ferry)
- Personal micromobility (e.g. E-bike, e-scooter)
- Micromobility sharing (e.g. Neuron, Beam, Lime)
- Conventional car-sharing (e.g. GoGet, Car Next Door)
- Bicycle/skateboard/scooter
- Walking

### **Diagrammatic summary of the methodological approach**

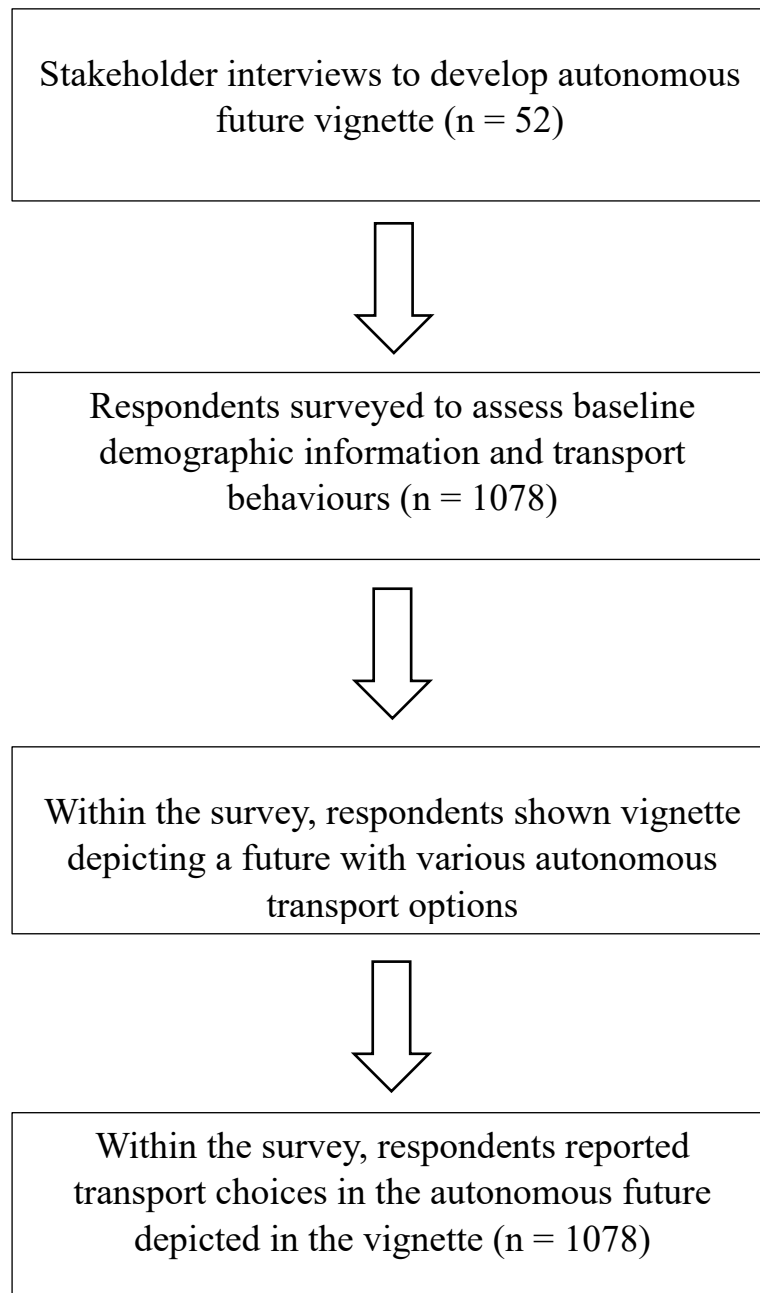

Supplement: s1 [file s1]
